1 Comparative genomics analysis of *Chryseobacterium* sp. KMC2 reveals metabolic  
2 pathways involved in keratinous utilization and natural product biosynthesis

3  
4 Dingrong Kang<sup>abcd\*</sup>, Saeed Shoaie<sup>c</sup>, Samuel Jacquiod<sup>c</sup>, Søren J. Sørensen<sup>a</sup>, Rodrigo Ledesma-  
5 Amaro<sup>b,\*</sup>

6  
7 <sup>a</sup>Section of Microbiology, Department of Biology, University of Copenhagen, Copenhagen,  
8 Denmark

9  
10 <sup>b</sup>Department of Bioengineering and Imperial College Centre for Synthetic Biology, Imperial  
11 College London, London, SW7 2AZ, UK

12  
13 <sup>c</sup>Centre for Host-Microbiome Interactions, Faculty of Dentistry, Oral & Craniofacial Sciences,  
14 King's College London, SE1 9RT, UK

15  
16 <sup>d</sup>TERRA Research and Teaching Centre, Microbial Processes and Interactions (MiPI),  
17 Gembloux Agro-Bio Tech, University of Liège, Gembloux, Belgium

18  
19 <sup>e</sup>Agroécologie, AgroSup Dijon, INRAE, Univ. Bourgogne, Univ. Bourgogne Franche-Comté, F-  
20 21000 Dijon, France

21  
22 \*Corresponding authors: Rodrigo Ledesma-Amaro ([r.ledesma-amaro@imperial.ac.uk](mailto:r.ledesma-amaro@imperial.ac.uk)) and  
23 Dingrong Kang ([dingrong.kang@hotmail.com](mailto:dingrong.kang@hotmail.com))

24 **Abstract**

25 Several efforts have been made to valorize keratinous materials, an abundant and renewable  
26 resource. Despite these attempts to valorize products generated from keratin hydrolysate, either  
27 *via* chemical or microbial conversion, they generally remain with an overall low value. In this  
28 study, a promising keratinolytic strain from the genus *Chryseobacterium* (*Chryseobacterium* sp.  
29 KMC2) was investigated using comparative genomic tools against publicly available reference  
30 genomes to reveal the metabolic potential for biosynthesis of valuable secondary metabolites.  
31 Genome and metabolic features of four species were compared, shows different gene numbers  
32 but similar functional categories. We successfully mined eleven different secondary metabolite  
33 gene clusters of interest from the four genomes, including five common ones shared across all  
34 genomes. Among the common metabolites, we identified gene clusters involved in biosynthesis  
35 of flexirubin-type pigment, microviridin, and siderophore, all showing remarkable conservation  
36 across the four genomes. Unique secondary metabolite gene clusters were also discovered, for  
37 example, ladderane from *Chryseobacterium* sp. KMC2. Additionally, this study provides a more  
38 comprehensive understanding of the potential metabolic pathways of keratin utilization in  
39 *Chryseobacterium* sp. KMC2, with the involvement of amino acid metabolism, TCA cycle,  
40 glycolysis/gluconeogenesis, propanoate metabolism, and sulfate reduction. This work uncovers  
41 the biosynthesis of secondary metabolite gene clusters from four keratinolytic *Chryseobacterium*  
42 spp. and shades lights on the keratinolytic potential of *Chryseobacterium* sp. KMC2 from a  
43 genome-mining perspective, providing alternatives to valorize keratinous materials into high-  
44 value natural products.

45

46

47 **Importance**

48 Keratin is an abundant and renewable resource from slaughterhouses or the poultry industry.  
49 Low-value products such as animal feed and fertilizer were generated from these feedstocks  
50 based on conventional processing like chemical conversion. In fact, microorganisms possess the  
51 potential to synthesize valuable natural products. In this work, we explored the metabolic  
52 potential of *Chryseobacterium* sp. KMC2, which was isolated with efficient keratinolytic  
53 capacity from a previous study. Comparative genomics analysis displayed similar functional  
54 categories against three publicly available reference genomes of keratin-  
55 degrading *Chryseobacterium* spp.. Eleven different secondary metabolite gene clusters of interest  
56 were mined among four genomes, including five common and unique ones. Furthermore, we  
57 provide a more comprehensive understanding of metabolic pathways on keratin utilization  
58 in *Chryseobacterium* sp. KMC2, with the involvement of amino acid assimilation and sulfate  
59 reduction. These findings contribute to expanding the application of *Chryseobacterium* sp.  
60 KMC2 on the valorization of keratinous materials.

61

62 **Keywords:** keratinous materials, metabolic potential, genome mining, gene clusters,  
63 degradation pathways

64

65

66

67

68

69

## 70 **Introduction**

71 Keratin is the most abundant proteins in epithelial cells, constituting the bulk of epidermal  
72 appendages such as hair and feather (1, 2). Keratinous materials represent an abundant protein  
73 source, particularly originating from the commercial slaughterhouses or poultry farms (3). They  
74 contain peptides and amino acids, which are renewable natural resources with great potential in  
75 sustainable development (4). However, keratin is an insoluble protein with highly cross-linked  
76 disulfide bonds giving it a tough and recalcitrant structure (5). Many attempts have been made to  
77 hydrolysis keratinous materials in terms of physicochemical treatment, enzymatic hydrolysis,  
78 and microbial conversion (6, 7). The hydrolysis products of keratinous materials have been used  
79 for animal feed (8) and fertilizer (6, 9) based on conventional processing.

80

81 Microorganisms represent one of the most important natural sources, which have the potential to  
82 generate bioactive compounds such as antibiotics, biofuels, and natural pigments derived from  
83 cellular metabolites (10, 11). For example, *Yarrowia lipolytica* has been used to convert different  
84 renewable feedstocks to high-value metabolites (12). Similarly, *Escherichia coli* has become one  
85 of the best cell reactors to produce alcohols, organic acids, biodiesel, even hydrogen by utilizing  
86 renewable resources (13). Other bacteria such as *Bacillus subtilis* (14), *Caldicellulosiruptor*  
87 *bescii* (15), *Corynebacterium glutamicum* (16), and *Ruminococcaceae* bacterium (17) were  
88 identified and evaluated with the capacity to generate different products by converting renewable  
89 carbon sources. Notably, some microorganisms were reported to degrade keratinous waste  
90 effectively (18). Exploring keratinolytic potential of these microbes to generate high value-added  
91 products is an important step to recycle and valorize keratinous materials.

92

93 Molecular mechanisms of microbial keratin degradation are still not fully understood, while  
94 genome sequencing offers possibilities to reveal the metabolic potential behind efficient  
95 microbial degradation (19). Novel keratinolytic enzymes were identified from the genome of  
96 *Bacillus pumilus* 8A6, an efficient keratin degrader (20). Furthermore, going beyond the  
97 degradation reaction itself, genomes can also be mined for valuable accessory functions of  
98 interest, adding more values to the microbial conversion processes. For instance, gene clusters  
99 and biosynthesis pathways of secondary metabolites could be disclosed from genomes *via*  
100 adequate analysis tools (21, 22). A total of 104 putative biosynthetic gene clusters (BGCs) for  
101 secondary metabolites were predicted from nine *Ktedonobacteria* genomes (23). Secondary  
102 metabolites were identified and linked to gene clusters based on the comparison and mining of  
103 six genomes belonging to diverse *Aspergillus* species, successfully fueling industrial  
104 biotechnology initiatives and medical research (24). Therefore, using the genomes of  
105 keratinolytic microbial species in a similar way would represent a promising approach to  
106 discover biosynthetic gene clusters of secondary metabolites of interest, excavating the full  
107 application potential of these microbes.

108

109 Recently, several studies based on different environments have revealed the remarkable potential  
110 of representative taxa from the *Chryseobacterium* genus for keratin degradation using isolation,  
111 activity tests and genome sequencing (25, 26). In this study, a novel strain *Chryseobacterium* sp.  
112 KMC2 was previously obtained from an enrichment procedure, displaying a potent capacity of  
113 keratin degradation (27). The genome of *Chryseobacterium* sp. KMC2 was analyzed and  
114 compared with publicly available genomes of other keratinolytic *Chryseobacterium* spp. to  
115 clarify the genomic basis of keratin degradation, and to unravel hidden biosynthetic gene clusters

116 of interest. Subsequently, the metabolic pathways associated with keratin degradation were  
117 constructed, providing deeper insight into the yet obscure keratinolytic processes. This work  
118 reveals the keratinolytic potential of *Chryseobacterium* spp. and mined potential accessory gene  
119 clusters of secondary metabolites, which could i) contribute to optimizing the processes of  
120 keratin degradation and ii) broaden the perspective to generate added-value products from  
121 keratin hydrolysate.

122

123

## 124 **Results and discussion**

125

### 126 **Genome feature comparison of four keratinolytic *Chryseobacterium* strains**

127 *Chryseobacterium* sp. KMC2 originated from a river-bank soil sample, and displayed a potent  
128 degradation ability toward milled pig bristle and hooves (27, 28). The genome of  
129 *Chryseobacterium* sp. KMC2 was sequenced and compared to three reference genomes of  
130 *Chryseobacterium* spp. Including: i) *Chryseobacterium camelliae* Dolsongi-HT, isolated from  
131 green tea leaves (29); ii) *Chryseobacterium gallinarum* strain DSM 27622, isolated from chicken  
132 (30); and iii) *Chryseobacterium* sp. strain P1-3 isolated from poultry waste (31), which all  
133 display keratinolytic capacity (Table 1). *Chryseobacterium* sp. KMC2 showed distinct genome  
134 feature from the other known keratinolytic strains. The genome size of *Chryseobacterium* sp.  
135 KMC2 is 5.28 Mbp, larger than the other three genomes, which ranged from 4.38 Mbp to 4.63  
136 Mbp. A total of 4,773 genes were predicted from *Chryseobacterium* sp. KMC2 genome, and  
137 about 4,000 genes were annotated from the other three genomes. Besides, the GC content ranges  
138 from 36.33% to 41.80% in *Chryseobacterium* spp. genomes. Furthermore, the whole-genome

139 phylogenetic tree was constructed with other eight publically available *Chryseobacterium* spp.  
140 genomes (Fig. 1a), showing the highly similarity among *Chryseobacterium gallinarum* strain  
141 DSM 27622 and *Chryseobacterium* sp. strain P1-3. Notably, *Chryseobacterium* sp. KMC2 and  
142 *Chryseobacterium camelliae* Dolsongi-HT have closer evolutionary relationship with other  
143 *Chryseobacterium* species. Although the keratinolytic capacity within these eight strains is still  
144 not clear, more keratinolytic species are expected to be found in this genus according to the  
145 phylogenic tree analysis. Four strains among this genus have documented with actual keratin  
146 degradation capability (29-31), while *Chryseobacterium* sp. KMC2 may possess different  
147 keratinolytic potential encoded in its larger genome compared to three other *Chryseobacterium*  
148 strains.

149

#### 150 **Metabolic potential comparison of four keratinolytic *Chryseobacterium* genomes**

151 About 40% of the genes from the four genomes were classified into various functional categories  
152 based on the KEGG database. The vast majority of annotated genes belonged to metabolism,  
153 genetic information processing, environmental information processing, and cellular processes  
154 (Fig. 1b). The functional categories of the genomes were overall highly similar, with ~85% of  
155 annotated genes assigned to “metabolism” (category A) which included ~1.000 genes into the  
156 sub-category “global and overview maps”. Additionally, about 8% and 4% annotated genes from  
157 each genome were assigned to “genetic information processing” (category B) and  
158 “environmental information processing” (category C), respectively. The remaining annotated  
159 genes belonged to “cellular processes” (category D), which occupied 3% of the annotated  
160 genomes approximately.

161

162 Remarkably, each genome had more than 200 genes assigned into the "amino acid metabolism"  
163 sub-category. Keratin is mainly composed of amino acids (3), which is ultimately the operational  
164 carbon nutrient source exploited for microbial growth. Numerous amino acid metabolism-related  
165 enzymes were annotated, revealing the genetic potential of these *Chryseobacterium* strains for  
166 using keratin materials as energy sources. Of particular interest, several biosynthesis genes of  
167 secondary metabolites were detected from the genomes, of which more than 20 genes were  
168 annotated as “metabolism of terpenoids and polyketides” and around 40 genes were annotated as  
169 “biosynthesis of other secondary metabolites” sub-category (Fig. 1b). Terpenoids are a group of  
170 natural products with diverse commercial applications, which have been produced from  
171 microbial cell factories (32). Many polyketides are considered as significant natural products  
172 with broad applications in the agriculture and pharmaceutical industry (33). The metabolic  
173 pathways related to polyketides biosynthesis production are well understood in some  
174 microorganisms like *Streptomyces* which play a crucial role in industrial bioproduction (34).  
175 This result indicates that these *Chryseobacterium* strains could have the potential to synthesize  
176 high-value secondary metabolites such as terpenoids and polyketides from keratinous materials.

177

### 178 **Mining and comparing secondary metabolite gene clusters**

179 Genome mining is an effective approach to discover new natural products from microorganisms  
180 based on “signature genes” detection or searching for specific patterns in gene sequences (35).  
181 To explore the potential of producing high value chemicals from these four *Chryseobacterium*,  
182 secondary metabolite gene clusters were predicted by using antiSMASH 5.0 mining pipeline (Fig.  
183 2). In total, eleven different secondary metabolite gene clusters were identified.  
184 *Chryseobacterium* sp. KMC2 possesses the largest number (15), while *Chryseobacterium*



185 *camelliae* Dolsongi-HT1 has the fewest (8). Ten gene clusters were predicted from the other two  
186 strains. Five clusters are present in the four genomes, which are flexirubin-type pigment  
187 (resorcinol and arylpolyene), microviridin, lanthipeptide, NRPS-like, and siderophore.  
188 Remarkably, the flexirubin-type pigment is a typical metabolite produced from *Flavobacterium*  
189 (36). Several species from *Chryseobacterium* were previously designated and known  
190 as *Flavobacterium* owes to similar characteristics including the presence of yellow pigments (37).  
191 Flexirubin-type pigment was isolated and characterized from *Chryseobacterium* sp. UTM-3T  
192 (38). In addition, *Chryseobacterium* sp. KMC2 owns a unique gene cluster to produce ladderane.  
193 Another unique natural product is beta-lactone from *Chryseobacterium camelliae* Dolsongi-HT1.  
194 Ladderanes are hydrocarbon chains which were regarded as membrane lipid components  
195 produced by anammox (anaerobic ammonia-oxidizing) bacteria uniquely, but the production is  
196 not affordable due to their extremely low growth (39, 40). These results demonstrate that various  
197 secondary metabolite gene clusters including both expected and unusual candidates were  
198 discovered from *Chryseobacterium* genomes, which could turn into novel natural product  
199 sources.

200

### 201 **Synteny analysis and features of secondary metabolite gene clusters**

202 Comparative genomics can reveal unique cluster and distribution patterns of secondary  
203 metabolites in species (41). Five secondary metabolite gene clusters, predicted to be present in  
204 the four genomes, were selected to explore the evolutionary relationship among four  
205 *Chryseobacterium* strains. Three of them including flexirubin-type pigment, microviridin, and  
206 siderophore display a conserved gene cluster structure from synteny analysis (Fig. 3, 4, and 5),  
207 while the other two showed no evident synteny relation (Fig. S1 and S2).

208  
209 **Flexirubin-type pigment.** Natural pigments have increasing applications in food,  
210 pharmaceutical, and textile industries, owing to their advantages such as non-toxic,  
211 biodegradable, and low allergenic potential compared to synthetic pigments (42). In particular,  
212 flexirubin-type pigment has a potential antimicrobial and anti-tumoral activities (43).  
213 Biosynthesis gene clusters of flexirubin-type pigment are conserved across the four tested  
214 genomes, especially within *Chryseobacterium gallinarum* strain DSM 27622 and  
215 *Chryseobacterium* sp. strain P1-3 (Fig. 3a). A total of 61 biosynthesis-related genes of  
216 flexirubin-type pigment were predicted from *Chryseobacterium* sp. KMC2, including four core  
217 biosynthesis genes. One of the core biosynthesis genes was annotated as 3-oxoacyl-(acyl carrier  
218 protein) synthase III (*Flex11*), and the other three were annotated as Beta-ketoacyl synthases  
219 (*Flex21*, *Flex24*, and *Flex40*). Besides, transport-related genes and regulatory genes were  
220 predicted from the gene cluster. A previous study identified the molecular structure of flexirubin-  
221 type pigment isolated from a *Chryseobacterium* sp. UTM-3T (38). According to the products  
222 from core biosynthesis genes and their molecular structures, a proposition of biosynthesis  
223 pathway was established (Fig. 3b), where flexirubin-type pigment is generated from resorcinol  
224 and arylpolyene. Further transcriptomics and metabolomics analysis would be required to  
225 confirm the validity of this potential pathway discovery.

226  
227 **Microviridin.** Microviridins represent a group of ribosomally synthesized peptides under post-  
228 translational modifications, which have been mainly isolated from cyanobacteria and present  
229 potent serine-type protease inhibitory activities (44, 45). These properties could make  
230 microviridin serve as the natural antimicrobial agents for developing potential drugs.

231 Biosynthesis gene clusters of microviridin from four *Chryseobacterium* genomes show a highly  
232 conserved structure with a similarity greater than 71% from most gene synteny analysis (Fig. 4a).  
233 There are 23 biosynthesis genes of microviridin that were predicted from *Chryseobacterium* sp.  
234 KMC2. Two core biosynthetic genes (A and B) were identified from genomes and transport-  
235 related genes were also been discovered. Besides, amino acid sequences of mvdA and mvdB  
236 were aligned, showing that multiple motifs from mvdA and mvdB are conserved (Fig. 4bc).  
237 Interestingly, many keratinases were reported to be classified as serine proteases, acting on the  
238 molecular structure of keratin (46). This suggests that microviridins may regulate keratinolytic  
239 activity, further characterizing and manipulating the microviridin synthetic pathway could  
240 contribute to improving the keratin degradation efficiency.

241  
242 **Siderophore.** Siderophores are ferric ion-specific chelators to scavenge iron from the  
243 extracellular environment, which play important roles in virulence and oxidative stress tolerance  
244 in microorganisms (47). It has been designed as a Trojan horse antibiotic to enter and kill  
245 pathogenic bacteria (48), and also has shown the potential to decrease the growth of cancerous  
246 cells (49). Biosynthesis gene cluster of siderophore shows a high synteny conservation among  
247 *Chryseobacterium* sp. KMC2 and *Chryseobacterium camelliae* Dolsongi-HT1,  
248 *Chryseobacterium gallinarum* strain DSM 27622 and *Chryseobacterium* sp. Strain P1-3,  
249 respectively (Fig. 5). A total of ten genes were predicted from siderophore biosynthesis cluster of  
250 *Chryseobacterium* sp. KMC2, and eight genes from the other three *Chryseobacterium* strains  
251 separately. Functional description of each gene related to siderophore biosynthesis in  
252 *Chryseobacterium* sp. KMC2 shows two core biosynthesis genes, and includes one regulatory  
253 gene and one transport-related gene. This further suggests that those siderophore are potentially

254 fully functional molecular features that can be regulated on-demand and exported outside the cell  
255 when needed.

256

### 257 **Metabolic pathways of keratin utilization in *Chryseobacterium* sp. KMC2 genome**

258 The main metabolic pathways related to keratin utilization in *Chryseobacterium* sp. KMC2  
259 genome were investigated. These pathways included amino acid metabolism, TCA cycle,  
260 glycolysis/gluconeogenesis, propanoate metabolism, and sulfate reduction (Fig. 6). A previous  
261 study suggested that abundant amino acids are released during microbial degradation and used as  
262 nutrient sources, such as leucine and aspartate (28). The metabolic pathways of amino acid  
263 utilization were mapped from the genome of *Chryseobacterium* sp. KMC2. Most of the amino  
264 acids are converted into intermediates of the TCA cycle. For instance, arginine can be converted  
265 to succinate, then enter to TCA cycle after a multiple-steps enzyme reaction. Aspartate, tyrosine,  
266 phenylalanine, and glutamate could serve as the substrates to generate fumarate, thus being part  
267 of the TCA cycle. Besides, isoleucine turns into the substrates of 2-methyl-acetoacetyl-CoA after  
268 several enzymatic steps, which is then converted into acetyl-CoA and propanoyl-CoA *via* acetyl-  
269 CoA C-acyltransferase. Acetyl-CoA is an important intermediate, which can entry to the TCA  
270 cycle *via* citrate synthase (50). It is also the precursors of fatty acid and polyketides biosynthesis  
271 (51). Propanoyl-CoA serves as the critical substrate within propanoate metabolism and can also  
272 be used to make lipids (52, 53). On the other hand, methionine can be converted to 2-  
273 oxobutanoate, which is also an intermediate of propanoate metabolism. Subsequently, the  
274 methylmalonyl-CoA generated in propanoate metabolism enters into the TCA cycle *via* succinyl-  
275 CoA. Besides, the key enzymes of glycolysis/gluconeogenesis were found, indicating the  
276 potential to produce essential biomass components based on oxaloacetate from TCA cycle.

277  
278 Evidence indicates that a source of redox is needed for complete keratin degradation with  
279 keratinases (54, 55). Several metabolites such as sulfite were revealed to be associated with  
280 efficient keratin degradation (56). Therefore, here the complete metabolic pathway of sulfate  
281 reduction was mapped in the genome, which shows that the potential to create a redox  
282 environment needed for keratinases is indeed present. Following the development of sequencing  
283 technologies, increasing genomes of keratinolytic species have been unveiled, which provide a  
284 genomic perspective to reveal the molecular keratinolytic mechanisms. For instance, metabolic  
285 pathways related to keratin degradation such as enzymolysis and reduction of disulfide bonds  
286 were clarified through uncovering the genetic basis of microbial genomes (57). The complex  
287 keratinolytic processes of *Streptomyces* sp. included protease secretion, iron uptake, spore  
288 formation, and resuscitation were recently revealed from a genome view (58). Our results are in  
289 line with the notion that a redox environment is indeed required for efficient keratinolytic  
290 activity to occur. It is expected that the integrated metabolic pathways associated with  
291 keratinolytic processes will be deciphered along with more genomes sequencing and biochemical  
292 studies of relevant metabolic pathways.

293

## 294 **Conclusion**

295 In this work, the genomes from four *Chryseobacterium* spp. with keratinolytic activity were  
296 analyzed. Common and unique secondary metabolite gene clusters were mined from  
297 *Chryseobacterium* spp. genomes, suggesting the potential to generate high value metabolites  
298 using keratin-rich wastes as the nutrient sources. Therefore, the use of these microorganisms  
299 could be an alternative way to valorize keratinous materials through microbial conversion.

300 Furthermore, the metabolic pathways of keratin degradation from *Chryseobacterium* sp. KMC2  
301 was studied from a genomic viewpoint. Nevertheless, there are still unknowns to link both  
302 metabolic pathways of keratinous utilization and the natural products biosynthesis.  
303 Understanding these connected pathways and their regulation will contribute to developing  
304 synthetic biology approaches to boost high value-added products from microbial keratin  
305 degradation.

306

## 307 **Materials and Methods**

308

### 309 **DNA preparation**

310 *Chryseobacterium* sp. KMC2 was isolated and identified from a keratinolytic microbial  
311 consortium enriched from a soil sample (19, 27, 28). The keratinolytic capacity of  
312 *Chryseobacterium* sp. KMC2 was evaluated as the keystone strain among the microbial  
313 consortium, which was able to degrade keratin materials efficiently (27). *Chryseobacterium* sp.  
314 KMC2 was inoculated to LB medium, and cultured overnight (200 rpm, 30 °C). Two milliliters  
315 of the suspension were centrifuged and collected to prepare the DNA extraction, performed by  
316 using by FAST Soil DNA Kit (MP Biomedicals, United States) according to the manufacturer's  
317 instructions.

318

### 319 **Genome sequencing, assembling, and functional annotation**

320 The genome sequencing was performed by an Illumina Miseq instrument at the University of  
321 Copenhagen by using DNA Library Preparation Kits v2 (2 × 250 bp), according to the  
322 manufacturer's instructions. Raw reads were treated and assembled to contigs on CLC Genomic

323 Workbench 8.5.1. The obtained contigs were validated using QUAST 4.5 (59). Genes were  
324 predicted from the contigs and further annotated with Prokka v1.14.5 (60). Predicted genes from  
325 contigs were submitted to eggNOG 5.0 database to obtain an integrated functional annotation  
326 and classification (61).

327

### 328 **Whole-genome phylogenetic analysis**

329 To determine the phylogenetic origin of *Chryseobacterium* sp. KMC2 in the *Chryseobacterium*  
330 genus, the whole-genome sequences of 11 publicly available *Chryseobacterium* spp. were  
331 downloaded from NCBI database to construct a phylogenetic tree. The whole-genome sequence-  
332 based phylogenetic tree was inferred by using an online pipeline: The Reference sequence  
333 Alignment based Phylogeny builder (REALPHY 1.12) (62), based on the merge reference  
334 alignments. Then the visualization of the phylogenetic tree was generated by iTOL v5 (63).

335

### 336 **Secondary metabolite gene cluster detection and annotation**

337 Assembled contigs of four *Chryseobacterium* spp. were uploaded to antiSMASH 5.0 secondary  
338 metabolite genome mining web platform (21). Predicted secondary metabolites gene clusters  
339 from *Chryseobacterium* sp. KMC2 were compared with other keratinolytic *Chryseobacterium*  
340 strains. Gene annotation of each cluster from *Chryseobacterium* sp. KMC2 was performed by  
341 Prokka v1.14.5 (60) and BLASTP with the NCBI database. The best match sequencing ID was  
342 recorded for the annotated genes. Synteny and features of conservative secondary metabolite  
343 gene clusters were analyzed by using Easyfig 2.2.2, showing the similarity of gene sequences  
344 (64). Feature comparison of amino acid sequences and motifs from core synthetic genes were

345 analyzed by using Clustal Omega (65) to get the multiple sequence alignment and using  
346 Seq2logo to generate sequence logo (66).

347

### 348 **Metabolic networks construction**

349 The genomes of *Chryseobacterium* sp. KMC2 and other three *Chryseobacterium* spp. were  
350 submitted to GhostKOALA (67) to obtain the KO number for each gene, then genes were  
351 assigned to different metabolic pathways and functional categories. Following the metabolic  
352 networks construction of *Chryseobacterium* sp. KMC2 was achieved through mapping the  
353 annotated enzyme genes to KEGG (68) reference pathway and Biocyc database (69) manually.

354

### 355 **Data availability**

356 Reference genomes were downloaded from the NCBI database: *Chryseobacterium camelliae*  
357 strain Dolsongi-HT1 (GenBank: GCA\_002770595.1), *Chryseobacterium gallinarum* strain DSM  
358 27622 (GenBank: GCA\_001021975.1), *Chryseobacterium* sp. P1-3 (GenBank:  
359 GCA\_000738495.1), *Chryseobacterium gleum* NCTC11432 (GenBank: GCA\_900636535.1),  
360 *Chryseobacterium bernardetii* H4638 (GenBank: GCA\_003815955.1), *Chryseobacterium*  
361 *arthrosphaerae* FDAAGOS 519 (GenBank: GCA\_003812705.1), *Chryseobacterium indologenes*  
362 FDAARGOS 337 (GenBank: GCA\_002208925.2), *Chryseobacterium joostei* DSM 16927  
363 (GenBank: GCA\_003815775.1), *Chryseobacterium glaciei* IHBB 10212 (GenBank:  
364 GCA\_001648155.1), *Chryseobacterium carnipullorum* F9942 (GenBank: GCA\_003815855.1),  
365 and *Chryseobacterium* sp. SNU WT5 (GenBank: GCA\_007362475.1). Raw sequencing data  
366 were deposited in the Sequence Read Archive (SRA) database under the BioProject number  
367 PRJNA686768 with an accession number SRR13278108. The assembled genome sequence



368 of *Chryseobacterium* sp. KMC2 has been deposited at DDBJ/ENA/GenBank under the accession  
369 JAESIT000000000.

370

### 371 **Acknowledgements**

372 This research was funded by the Danish Innovation Fund (Grant Number 1308-00015B,  
373 Keratin2Protein) and also under the support of the Chinese Scholarship Council (CSC)  
374 Scholarship Program.

375

376

### 377 **References**

- 378 1. Wang B, Yang W, McKittrick J, Meyers MA. 2016. Keratin: Structure, mechanical  
379 properties, occurrence in biological organisms, and efforts at bioinspiration. *Progress in*  
380 *Materials Science* 76:229-318.
- 381 2. Coulombe PA, Omary MB. 2002. ‘Hard’ and ‘soft’ principles defining the structure,  
382 function and regulation of keratin intermediate filaments. *Current opinion in cell biology* 14:110-  
383 122.
- 384 3. Kornilłowicz-Kowalska T, Bohacz J. 2011. Biodegradation of keratin waste: theory and  
385 practical aspects. *Waste management* 31:1689-1701.
- 386 4. Khosa M, Ullah A. 2013. A sustainable role of keratin biopolymer in green chemistry: a  
387 review. *J Food Processing & Beverages* 1:8.
- 388 5. Rajabi M, Ali A, McConnell M, Cabral J. 2020. Keratinous materials: Structures and  
389 functions in biomedical applications. *Materials Science and Engineering: C* 110:110612.

- 390 6. Holkar CR, Jain SS, Jadhav AJ, Pinjari DV. 2018. Valorization of keratin based waste.  
391 Process Safety and Environmental Protection 115:85-98.
- 392 7. Zhao W, Yang R, Zhang Y, Wu L. 2012. Sustainable and practical utilization of feather  
393 keratin by an innovative physicochemical pretreatment: high density steam flash-explosion.  
394 Green chemistry 14:3352-3360.
- 395 8. Dios D. 2001. Fishmeal replacement with feather-enzymatic hydrolyzates co-extruded  
396 with soya-bean meal in practical diets for the Pacific white shrimp (*Litopenaeus vannamei*).  
397 Aquaculture Nutrition 7:143-151.
- 398 9. Gaidau C, Epure D-G, Enascuta CE, Carsote C, Sendrea C, Proietti N, Chen W, Gu H.  
399 2019. Wool keratin total solubilisation for recovery and reintegration-An ecological approach.  
400 Journal of Cleaner Production 236:117586.
- 401 10. Donadio S, Monciardini P, Alduina R, Mazza P, Chiocchini C, Cavaletti L, Sosio M,  
402 Puglia AM. 2002. Microbial technologies for the discovery of novel bioactive metabolites.  
403 Journal of Biotechnology 99:187-198.
- 404 11. Smitha M, Singh S, Singh R. 2017. Microbial biotransformation: a process for chemical  
405 alterations. J Bacteriol Mycol Open Access 4:85.
- 406 12. Ledesma-Amaro R, Nicaud J-M. 2016. Metabolic engineering for expanding the  
407 substrate range of *Yarrowia lipolytica*. Trends in Biotechnology 34:798-809.
- 408 13. Zhao C, Zhang Y, Li Y. 2019. Production of fuels and chemicals from renewable  
409 resources using engineered *Escherichia coli*. Biotechnology advances 37:107402.
- 410 14. Chen C, Lin J, Wang W, Huang H, Li S. 2019. Cost-effective production of surfactin  
411 from xylose-rich corncob hydrolysate using *Bacillus subtilis* BS-37. Waste and Biomass  
412 Valorization 10:341-347.

- 413 15. Straub CT, Bing RG, Wang JP, Chiang VL, Adams MW, Kelly RM. 2020. Use of the  
414 lignocellulose-degrading bacterium *Caldicellulosiruptor bescii* to assess recalcitrance and  
415 conversion of wild-type and transgenic poplar. *Biotechnology for biofuels* 13:1-10.
- 416 16. Sgobba E, Blöbaum L, Wendisch VF. 2018. Production of food and feed additives from  
417 non-food-competing feedstocks: Valorizing N-acetylmuramic acid for amino acid and carotenoid  
418 fermentation with *Corynebacterium glutamicum*. *Frontiers in Microbiology* 9:2046.
- 419 17. Zhu X, Zhou Y, Wang Y, Wu T, Li X, Li D, Tao Y. 2017. Production of high-  
420 concentration n-caproic acid from lactate through fermentation using a newly isolated  
421 *Ruminococcaceae* bacterium CPB6. *Biotechnology for biofuels* 10:102.
- 422 18. Li Q. 2019. Progress in microbial degradation of feather waste. *Frontiers in Microbiology*  
423 10:2717.
- 424 19. Kang D, Huang Y, Nesme J, Herschend J, Jacquiod S, Kot W, Hansen LH, Lange L,  
425 Sørensen SJ. 2020. Metagenomic analysis of a keratin-degrading bacterial consortium provides  
426 insight into the keratinolytic mechanisms. *Science of The Total Environment*:143281.
- 427 20. Huang Y, Łężyk M, Herbst F-A, Busk PK, Lange L. 2020. Novel keratinolytic enzymes,  
428 discovered from a talented and efficient bacterial keratin degrader. *Scientific reports* 10:1-11.
- 429 21. Blin K, Shaw S, Steinke K, Villebro R, Ziemert N, Lee SY, Medema MH, Weber T. 2019.  
430 antiSMASH 5.0: updates to the secondary metabolite genome mining pipeline. *Nucleic acids*  
431 *research* 47:W81-W87.
- 432 22. Weber T, Kim HU. 2016. The secondary metabolite bioinformatics portal: Computational  
433 tools to facilitate synthetic biology of secondary metabolite production. *Synthetic and Systems*  
434 *Biotechnology* 1:69-79.

- 435 23. Zheng Y, Saitou A, Wang C-M, Toyoda A, Minakuchi Y, Sekiguchi Y, Ueda K, Takano  
436 H, Sakai Y, Abe K. 2019. Genome features and secondary metabolites biosynthetic potential of  
437 the class *Ktedonobacteria*. *Frontiers in microbiology* 10:893.
- 438 24. Kjærboelling I, Vesth TC, Frisvad JC, Nybo JL, Theobald S, Kuo A, Bowyer P, Matsuda  
439 Y, Mondo S, Lyhne EK. 2018. Linking secondary metabolites to gene clusters through genome  
440 sequencing of six diverse *Aspergillus* species. *Proceedings of the National Academy of Sciences*  
441 115:E753-E761.
- 442 25. Fontoura R, Daroit DJ, Corrêa APF, Moresco KS, Santi L, Beys-da-Silva WO, Yates III  
443 JR, Moreira JCF, Brandelli A. 2019. Characterization of a novel antioxidant peptide from feather  
444 keratin hydrolysates. *New biotechnology* 49:71-76.
- 445 26. Kshetri P, Roy SS, Sharma SK, Singh TS, Ansari MA, Prakash N, Ngachan S. 2019.  
446 Transforming chicken feather waste into feather protein hydrolysate using a newly isolated  
447 multifaceted keratinolytic bacterium *Chryseobacterium sediminis* RCM-SSR-7. *Waste and*  
448 *Biomass Valorization* 10:1-11.
- 449 27. Kang D, Jacquiod S, Herschend J, Wei S, Nesme J, Sørensen SJ. 2020. Construction of  
450 simplified microbial consortia to degrade recalcitrant materials based on enrichment and  
451 dilution-to-extinction cultures. *Frontiers in microbiology* 10:3010.
- 452 28. Kang D, Herschend J, Al-Soud WA, Mortensen MS, Gonzalo M, Jacquiod S, Sørensen  
453 SJ. 2018. Enrichment and characterization of an environmental microbial consortium displaying  
454 efficient keratinolytic activity. *Bioresource technology* 270:303-310.
- 455 29. Kim E-M, Hwang KH, Park J-S. 2018. Complete Genome Sequence of  
456 *Chryseobacterium camelliae* Dolsongi-HT1, a Green Tea Isolate with Keratinolytic Activity.  
457 *Genome Announcements* 6.

- 458 30. Park G-S, Hong S-J, Jung BK, Khan AR, Park Y-J, Park CE, Lee A, Kwak Y, Lee Y-J,  
459 Lee D-W. 2015. Complete genome sequence of a keratin-degrading bacterium *Chryseobacterium*  
460 *gallinarum* strain DSM 27622T isolated from chicken. *Journal of biotechnology* 211:66-67.
- 461 31. Park G-S, Hong S-J, Lee C-H, Khan AR, Ullah I, Jung BK, Choi J, Kwak Y, Back C-G,  
462 Jung H-Y. 2014. Draft genome sequence of *Chryseobacterium* sp. strain P1-3, a keratinolytic  
463 bacterium isolated from poultry waste. *Genome announcements* 2.
- 464 32. Lin P-C, Pakrasi HB. 2019. Engineering cyanobacteria for production of terpenoids.  
465 *Planta* 249:145-154.
- 466 33. Barajas JF, Blake-Hedges JM, Bailey CB, Curran S, Keasling JD. 2017. Engineered  
467 polyketides: synergy between protein and host level engineering. *Synthetic and systems*  
468 *biotechnology* 2:147-166.
- 469 34. Wang W, Li S, Li Z, Zhang J, Fan K, Tan G, Ai G, Lam SM, Shui G, Yang Z. 2020.  
470 Harnessing the intracellular triacylglycerols for titer improvement of polyketides in *Streptomyces*.  
471 *Nature Biotechnology* 38:76-83.
- 472 35. Adamek M, Spohn M, Stegmann E, Ziemert N. 2017. Mining bacterial genomes for  
473 secondary metabolite gene clusters, p 23-47, *Antibiotics*. Springer.
- 474 36. Reichenbach H, Kohl W, Böttger-Vetter A, Achenbach H. 1980. Flexirubin-type  
475 pigments in *Flavobacterium*. *Archives of Microbiology* 126:291-293.
- 476 37. Vandamme P, Bernardet J-F, Segers P, Kersters K, Holmes B. 1994. New Perspectives in  
477 the Classification of the Flavobacteria: Description of *Chryseobacterium* gen. nov., *Bergeyella*  
478 gen. nov., and *Empedobacter* nom. rev. *International Journal of Systematic and Evolutionary*  
479 *Microbiology* 44:827-831.

- 480 38. Venil CK, Zakaria ZA, Usha R, Ahmad WA. 2014. Isolation and characterization of  
481 flexirubin type pigment from *Chryseobacterium* sp. UTM-3T. Biocatalysis and Agricultural  
482 Biotechnology 3:103-107.
- 483 39. Javidpour P, Deutsch S, Mutalik VK, Hillson NJ, Petzold CJ, Keasling JD, Beller HR.  
484 2016. Investigation of proposed ladderane biosynthetic genes from anammox bacteria by  
485 heterologous expression in *E. coli*. PloS one 11:e0151087.
- 486 40. Mercer JA, Cohen CM, Shuken SR, Wagner AM, Smith MW, Moss III FR, Smith MD,  
487 Vahala R, Gonzalez-Martinez A, Boxer SG. 2016. Chemical synthesis and self-assembly of a  
488 ladderane phospholipid. Journal of the American Chemical Society 138:15845-15848.
- 489 41. Adamek M, Alanjary M, Sales-Ortells H, Goodfellow M, Bull AT, Winkler A, Wibberg  
490 D, Kalinowski J, Ziemert N. 2018. Comparative genomics reveals phylogenetic distribution  
491 patterns of secondary metabolites in *Amycolatopsis* species. BMC genomics 19:1-15.
- 492 42. Venil CK, Zakaria ZA, Ahmad WA. 2013. Bacterial pigments and their applications.  
493 Process Biochemistry 48:1065-1079.
- 494 43. Aruldass CA, Dufossé L, Ahmad WA. 2018. Current perspective of yellowish-orange  
495 pigments from microorganisms-a review. Journal of Cleaner Production 180:168-182.
- 496 44. Philmus B, Christiansen G, Yoshida WY, Hemscheidt TK. 2008. Post-translational  
497 modification in microviridin biosynthesis. ChemBioChem 9:3066-3073.
- 498 45. Gatte-Picchi D, Weiz A, Ishida K, Hertweck C, Dittmann E. 2014. Functional analysis of  
499 environmental DNA-derived microviridins provides new insights into the diversity of the  
500 tricyclic peptide family. Applied and environmental microbiology 80:1380-1387.

- 501 46. Hassan MA, Abol-Fotouh D, Omer AM, Tamer TM, Abbas E. 2020. Comprehensive  
502 insights into microbial keratinases and their implication in various biotechnological and  
503 industrial sectors: A review. *International Journal of Biological Macromolecules*.
- 504 47. Khan A, Singh P, Srivastava A. 2018. Synthesis, nature and utility of universal iron  
505 chelator–Siderophore: A review. *Microbiological research* 212:103-111.
- 506 48. Boda SK, Pandit S, Garai A, Pal D, Basu B. 2016. Bacterial siderophore mimicking iron  
507 complexes as DNA targeting antimicrobials. *RSC advances* 6:39245-39260.
- 508 49. Nakouti I, Sihanonth P, Palaga T, Hobbs G. 2013. Effect of a siderophore producer on  
509 animal cell apoptosis: a possible role as anti-cancer agent. *International Journal of Pharma  
510 Medicine and Biological Sciences* 2:1-5.
- 511 50. REMINGTON SJ. 1992. Structure and mechanism of citrate synthase, p 209-229,  
512 *Current topics in cellular regulation*, vol 33. Elsevier.
- 513 51. Cronan JE, Thomas J. 2009. Bacterial fatty acid synthesis and its relationships with  
514 polyketide synthetic pathways. *Methods in enzymology* 459:395-433.
- 515 52. Park Y-K, Dulermo T, Ledesma-Amaro R, Nicaud J-M. 2018. Optimization of odd chain  
516 fatty acid production by *Yarrowia lipolytica*. *Biotechnology for biofuels* 11:1-12.
- 517 53. Park Y-k, Ledesma-Amaro R, Nicaud J-M. 2020. De novo biosynthesis of odd-chain  
518 fatty acids in *Yarrowia lipolytica* enabled by modular pathway engineering. *Frontiers in  
519 Bioengineering and Biotechnology* 7:484.
- 520 54. Nasipuri P, Herschend J, Brejnrod AD, Madsen JS, Espersen R, Svensson B, Burmølle M,  
521 Jacquioid S, Sørensen SJ. 2020. Community-intrinsic properties enhance keratin degradation  
522 from bacterial consortia. *PloS one* 15:e0228108.

- 523 55. Ramnani P, Gupta R. 2007. Keratinases vis-à-vis conventional proteases and feather  
524 degradation. *World Journal of Microbiology and Biotechnology* 23:1537-1540.
- 525 56. Navone L, Speight R. 2018. Understanding the dynamics of keratin weakening and  
526 hydrolysis by proteases. *PLoS One* 13:e0202608.
- 527 57. Huang Y, Busk PK, Herbst F-A, Lange L. 2015. Genome and secretome analyses provide  
528 insights into keratin decomposition by novel proteases from the non-pathogenic fungus *Onygena*  
529 *corvina*. *Applied microbiology and biotechnology* 99:9635-9649.
- 530 58. Li Z-W, Liang S, Ke Y, Deng J-J, Zhang M-S, Lu D-L, Li J-Z, Luo X-C. 2020. The  
531 feather degradation mechanisms of a new *Streptomyces* sp. isolate SCUT-3. *Communications*  
532 *Biology* 3:1-13.
- 533 59. Gurevich A, Saveliev V, Vyahhi N, Tesler G. 2013. QUAST: quality assessment tool for  
534 genome assemblies. *Bioinformatics* 29:1072-1075.
- 535 60. Seemann T. 2014. Prokka: rapid prokaryotic genome annotation. *Bioinformatics*  
536 30:2068-2069.
- 537 61. Huerta-Cepas J, Szklarczyk D, Heller D, Hernández-Plaza A, Forslund SK, Cook H,  
538 Mende DR, Letunic I, Rattei T, Jensen LJ. 2019. eggNOG 5.0: a hierarchical, functionally and  
539 phylogenetically annotated orthology resource based on 5090 organisms and 2502 viruses.  
540 *Nucleic acids research* 47:D309-D314.
- 541 62. Bertels F, Silander OK, Pachkov M, Rainey PB, van Nimwegen E. 2014. Automated  
542 reconstruction of whole-genome phylogenies from short-sequence reads. *Molecular biology and*  
543 *evolution* 31:1077-1088.
- 544 63. Letunic I, Bork P. 2019. Interactive Tree Of Life (iTOL) v4: recent updates and new  
545 developments. *Nucleic acids research* 47:W256-W259.



- 546 64. Sullivan MJ, Petty NK, Beatson SA. 2011. Easyfig: a genome comparison visualizer.  
547 *Bioinformatics* 27:1009-1010.
- 548 65. Sievers F, Higgins DG. 2018. Clustal Omega for making accurate alignments of many  
549 protein sequences. *Protein Science* 27:135-145.
- 550 66. Thomsen MCF, Nielsen M. 2012. Seq2Logo: a method for construction and visualization  
551 of amino acid binding motifs and sequence profiles including sequence weighting, pseudo counts  
552 and two-sided representation of amino acid enrichment and depletion. *Nucleic acids research*  
553 40:W281-W287.
- 554 67. Kanehisa M, Sato Y, Morishima K. 2016. BlastKOALA and GhostKOALA: KEGG tools  
555 for functional characterization of genome and metagenome sequences. *Journal of molecular*  
556 *biology* 428:726-731.
- 557 68. Kanehisa M, Araki M, Goto S, Hattori M, Hirakawa M, Itoh M, Katayama T, Kawashima  
558 S, Okuda S, Tokimatsu T. 2007. KEGG for linking genomes to life and the environment. *Nucleic*  
559 *acids research* 36:D480-D484.
- 560 69. Caspi R, Altman T, Billington R, Dreher K, Foerster H, Fulcher CA, Holland TA,  
561 Keseler IM, Kothari A, Kubo A. 2014. The MetaCyc database of metabolic pathways and  
562 enzymes and the BioCyc collection of Pathway/Genome Databases. *Nucleic acids research*  
563 42:D459-D471.
- 564
- 565
- 566
- 567
- 568

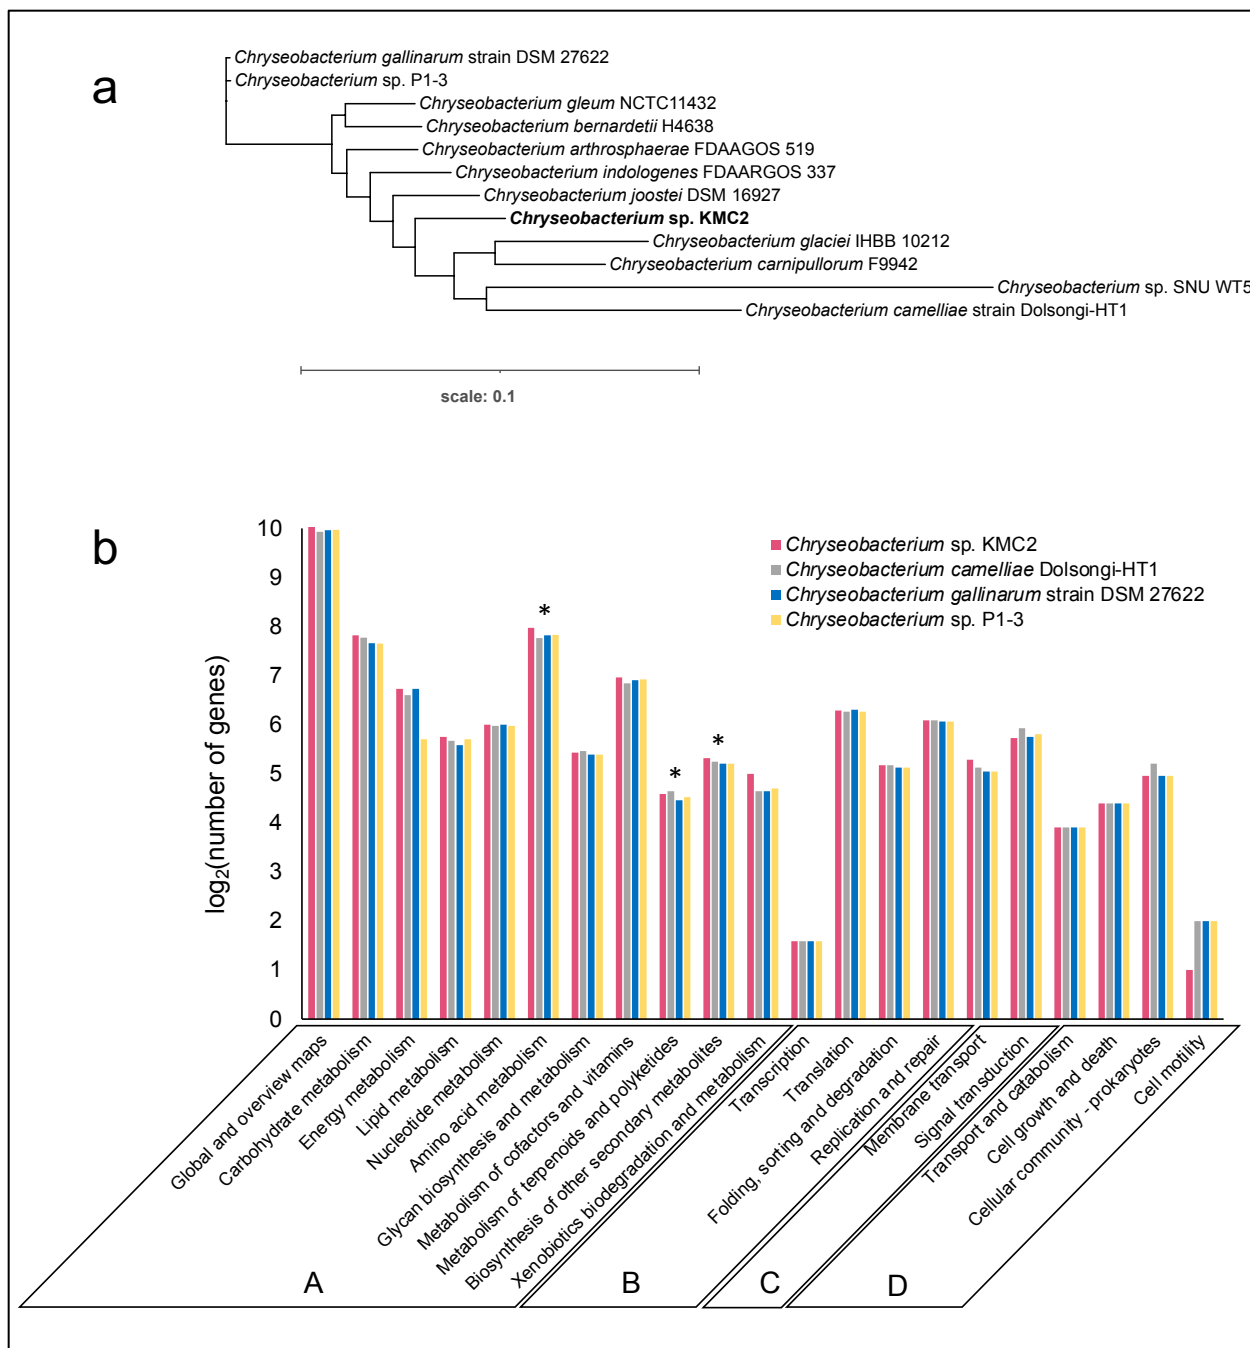

569

570 **Fig. 1. Analysis of the *Chryseobacterium* spp. genomes.** (a). The whole-genome sequence-  
 571 based phylogenetic tree of *Chryseobacterium* spp., constructed by REALPHY 1.12 (62), based  
 572 on the merge reference alignments of all genomes. Branch length represents divergence. (b).  
 573 Comparison of KEGG function classification amongst four *Chryseobacterium* spp. genomes.  
 574 Functional categories: Metabolism (A), Genetic information processing (B), Environmental

575 information processing (C), and Cellular processes (D). The stars show the sub-categories:  
576 Amino acid metabolism, metabolism of terpenoids and polyketides, and biosynthesis of other  
577 secondary metabolites.

578

579

580

581

582

583

584

585

586

587

588

589

590

591

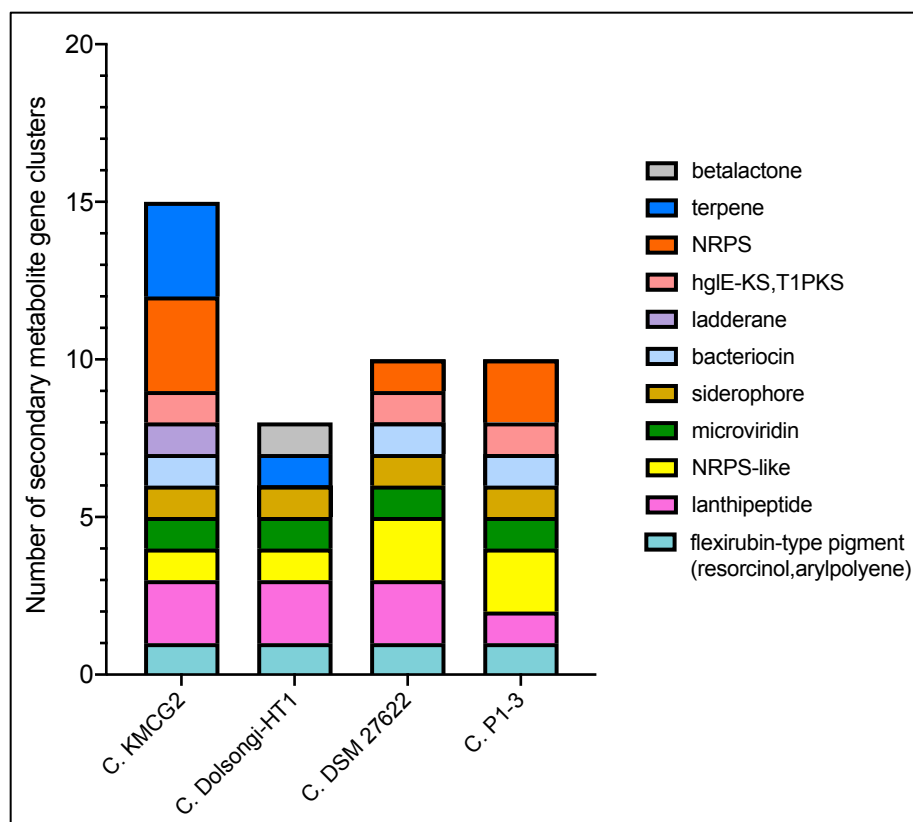

592

593 **Fig. 2. Composition of secondary metabolite gene clusters from four *Chryseobacterium* spp.**

594 **genomes.**

595

596

597

598

599

600

601

602

603

604

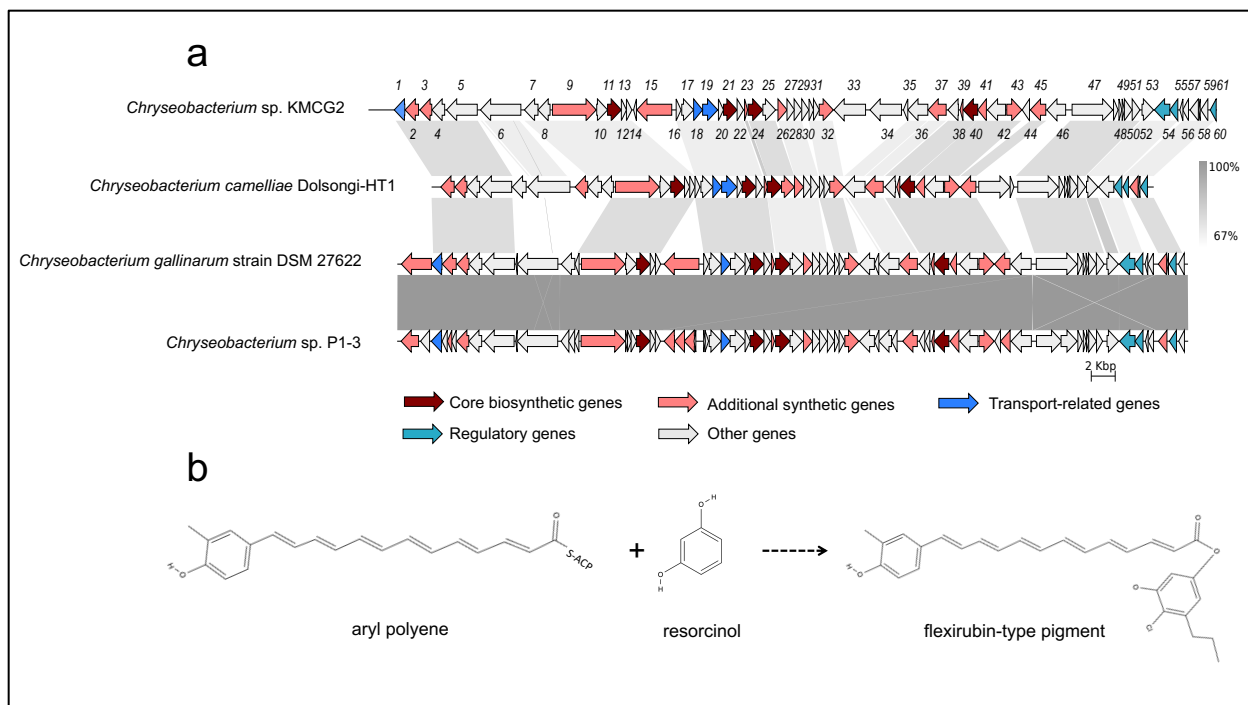

605  
606 **Fig. 3. Flexirubin-type pigment gene cluster from four *Chryseobacterium* spp. genomes. (a).**  
607 Synteny analysis and features of flexirubin-type pigment gene cluster in *Chryseobacterium* spp.  
608 genomes. (b). The proposed biosynthetic reaction of flexirubin-type pigment. The detailed  
609 description of each gene can be found in Table S1.

610  
611  
612  
613  
614  
615  
616

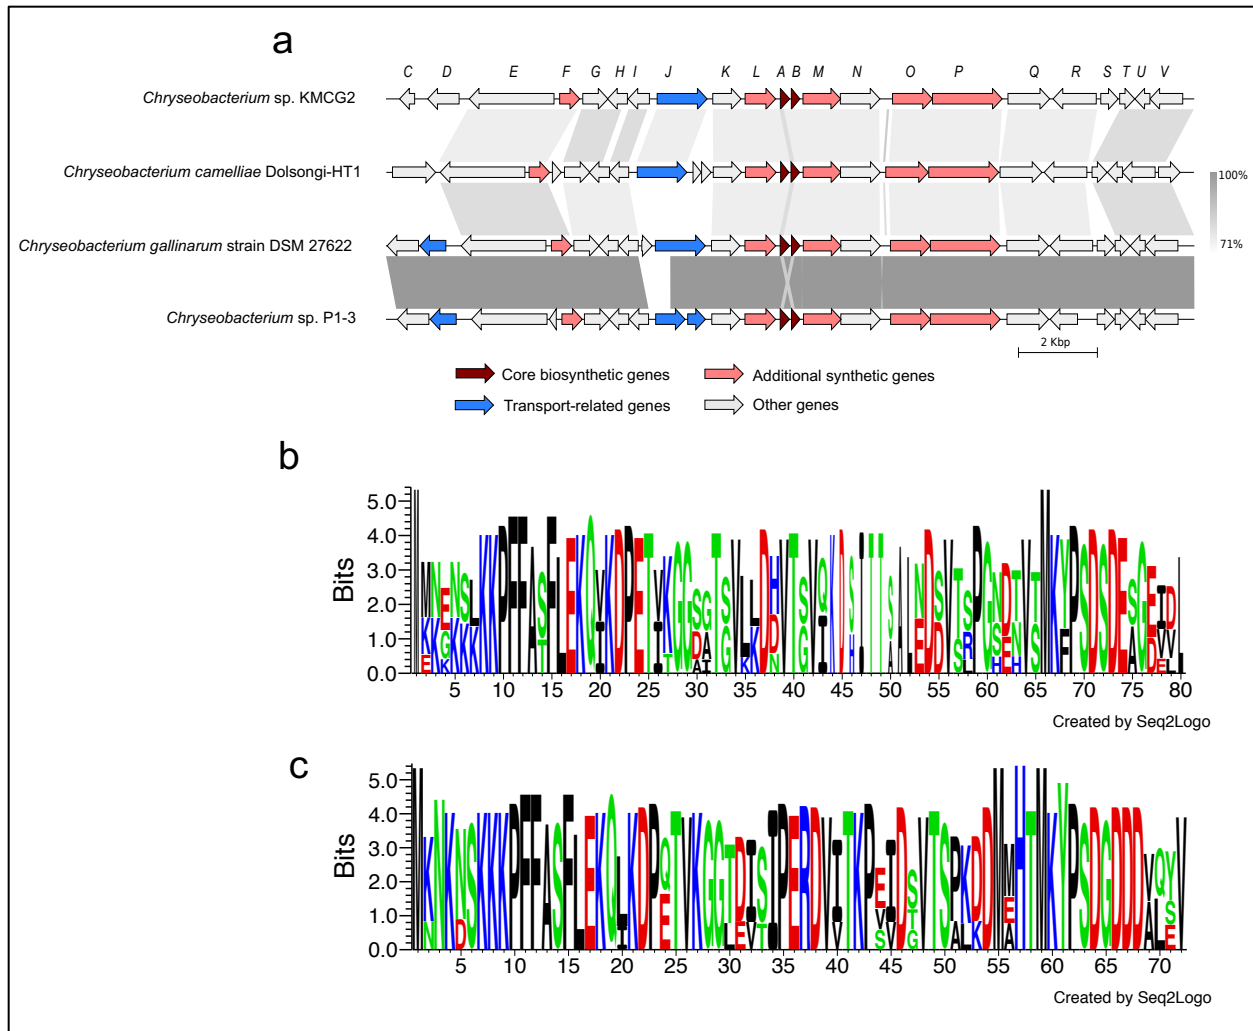

617

618 **Fig. 4. Microviridin gene cluster from four *Chryseobacterium* spp. genomes. (a).** Synteny

619 analysis and features of microviridin gene cluster in *Chryseobacterium* spp. genomes. (b).

620 Amino acid sequence comparison of mdnA from four *Chryseobacterium* spp. genomes. (c).

621 Amino acid sequence comparison of mdnB from four *Chryseobacterium* spp. genomes. The

622 detailed description of each gene can be found in Table S2.

623

624

625

626

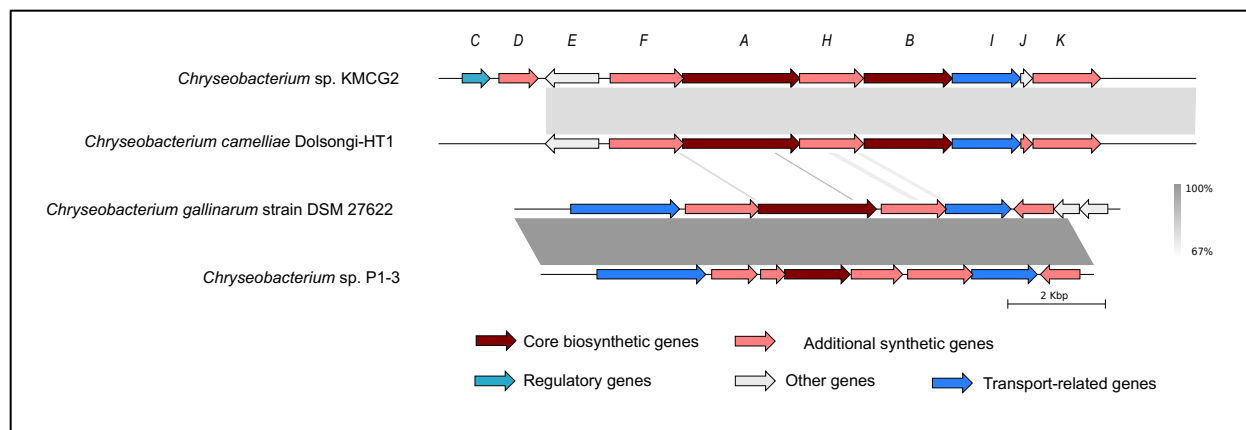

627

628 **Fig. 5. Siderophore gene cluster from four *Chryseobacterium* spp. genomes.** The detailed  
629 description of each gene can be found in Table S3.

630

631

632

633

634

635

636

637

638

639

640

641

642

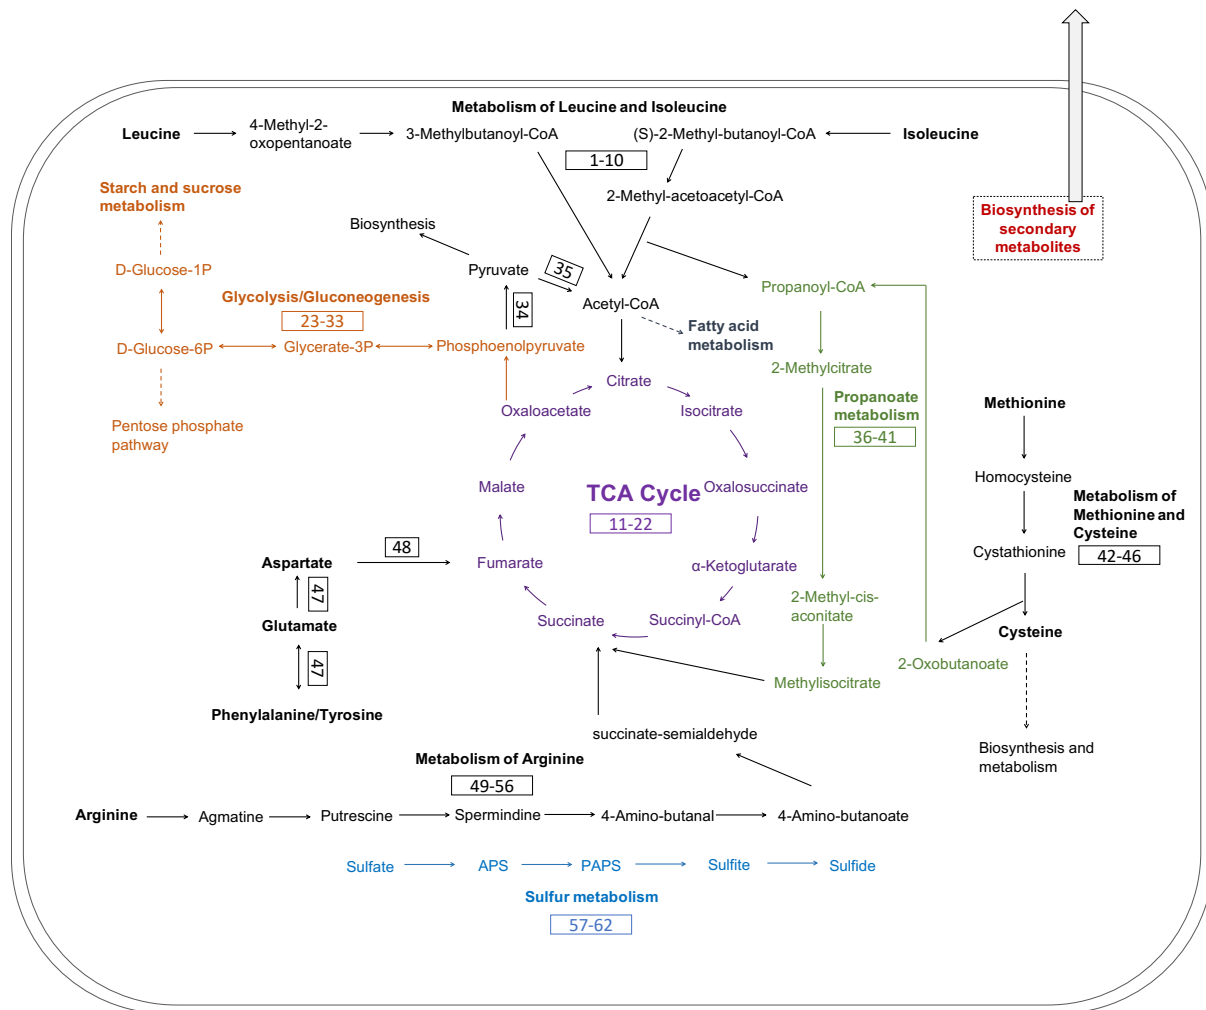

643  
 644 **Fig. 6. Metabolic pathways reconstruction of keratin utilization in *Chryseobacterium* sp.**  
 645 **KMC2 genome.** It includes amino acid metabolism, TCA cycle, glycolysis/gluconeogenesis  
 646 propanoate metabolism, and sulfur metabolism. The number in the box represents the gene  
 647 related to the metabolic pathway. The detailed description of each gene can be found in Table S7.

648  
 649  
 650  
 651  
 652



**Table 1. Features comparison of four *Chryseobacterium* spp. genomes.**

|                          | <i>Chryseobacterium</i> | <i>Chryseobacterium camelliae</i> | <i>Chryseobacterium gallinarum</i> | <i>Chryseobacterium</i> |
|--------------------------|-------------------------|-----------------------------------|------------------------------------|-------------------------|
| Parameters               | sp. KMC2                | Dolsongi-HT1                      | strain DSM 27622                   | sp. P1-3                |
| <b>Total length (bp)</b> | 5.276.159               | 4.376.354                         | 4.633.632                          | 4.628.764               |
| <b>Contigs</b>           | 63                      | 1                                 | 1                                  | 45                      |
| <b>N50 (bp)</b>          | 231.784                 | 4.376.354                         | 4.633.632                          | 342.512                 |
| <b>GC content (%)</b>    | 36.33                   | 41.80                             | 37.30                              | 37.02                   |
| <b>Gene</b>              | 4.773                   | 3.999                             | 4.182                              | 4.087                   |
| <b>CDS</b>               | 4.692                   | 3.881                             | 4.033                              | 3.119                   |
